# Supplementary material for: Application of a dual functional blocking layer for improvement of the responsivity in a self-powered UV photodetector based on TiO2 nanotubes
Source: Royal Society of Chemistry journal article supplement (doi:10.1039/d2ra00379a), 2022-01-01
Supplement: d2ra00379a1.pdf [file d2ra00379a1.pdf]

## Supporting Information for

Application of a Dual Functional Blocking Layer for Improvement of the  
Responsivity in Self-Powered UV Photodetector Based on TiO<sub>2</sub> Nanotubes.

Alireza Zare,<sup>a</sup> Saeed Behayin,<sup>b</sup> Mahmoud Moradi<sup>b</sup> and Zahra Hosseini<sup>\*a</sup>

<sup>a</sup> Faculty of Advanced Technologies, Shiraz University, Shiraz 7194684560, Iran. Email: [zahrahosseini@shirazu.ac.ir](mailto:zahrahosseini@shirazu.ac.ir)

<sup>b</sup> Department of Physics, School of Sciences, Shiraz University, Shiraz, Iran.

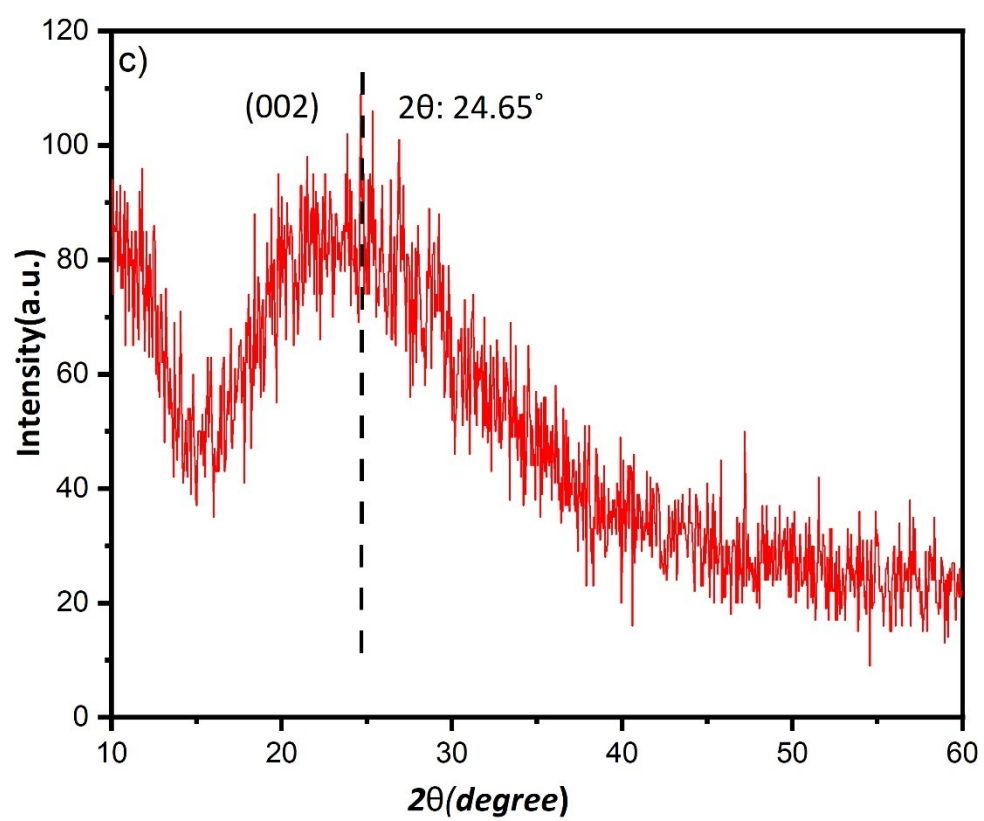

*Fig S1. XRD pattern of aqueous GQDs solution.*

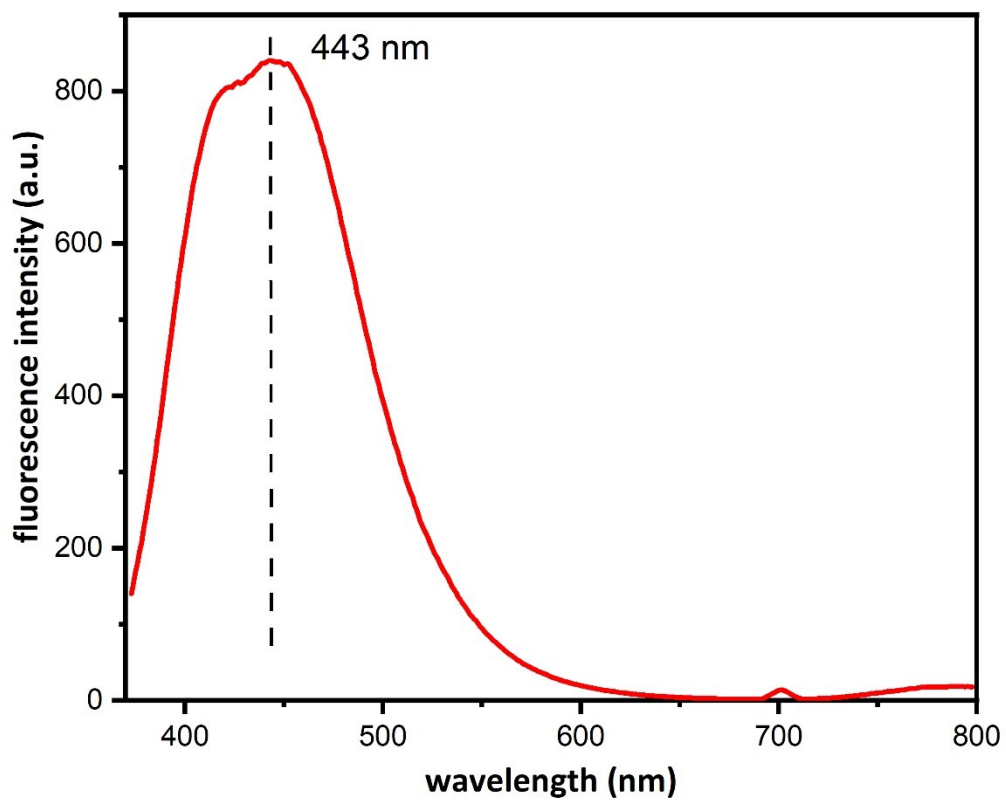

*Fig. S2. The Photoluminescence spectrum of aqueous GQD solution.*

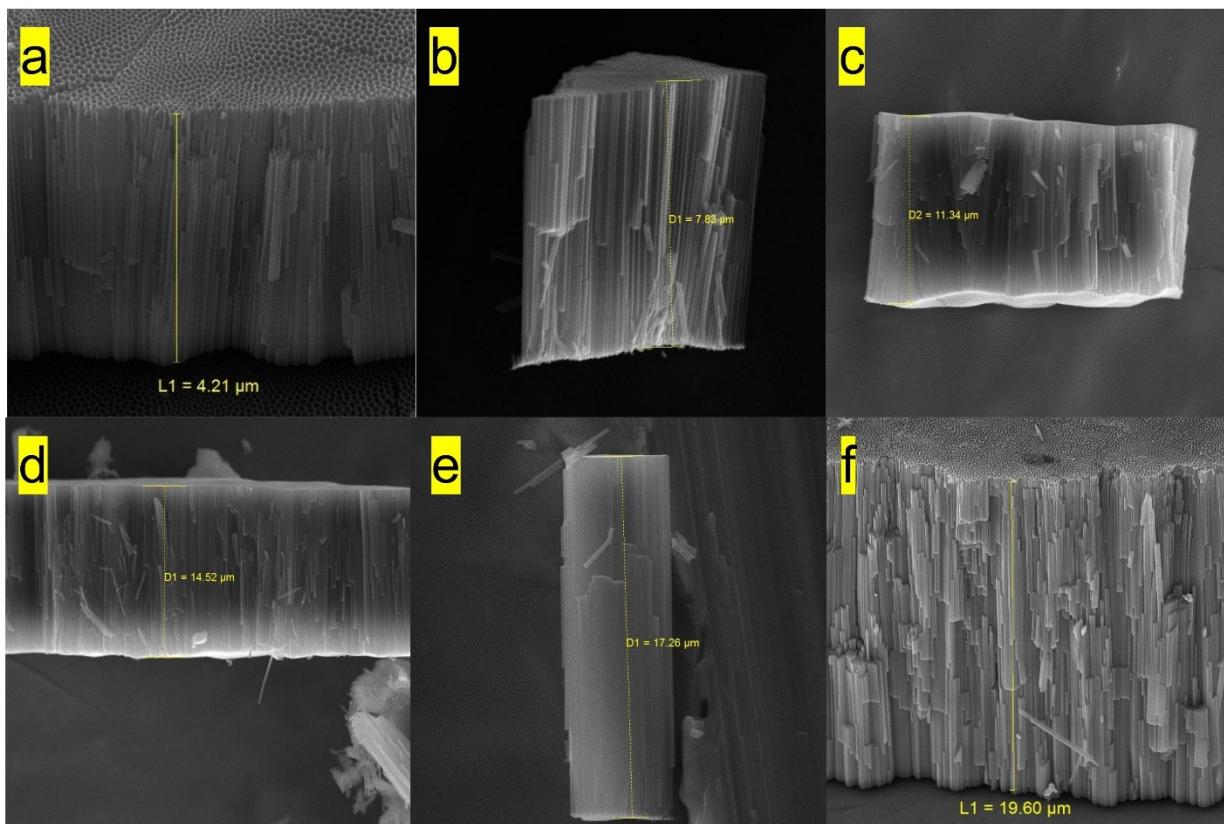

*Fig. S3. Cross-sectional FESEM images of TiO<sub>2</sub> NTs synthesized by anodization method. a) 4.21 μm NTs, b) 7.83 μm NTs, c) 11.34 μm NTs, d) 14.52 μm NTs, e) 17.26 μm NTs, f) 16.61 μm NTs.*

*Table S1. Anodization parameters for the synthesise of TiO2 NTs.*

| <b>NTs length (<math>\mu\text{m}</math>)</b> | <b>Anodization time (minutes)</b> | <b>Temperature (<math>^{\circ}\text{C}</math>)</b> |
|----------------------------------------------|-----------------------------------|----------------------------------------------------|
| 3-5                                          | 38                                | 23-27                                              |
| 6-8                                          | 45                                | 23-27                                              |
| 10-12                                        | 76                                | 23-27                                              |
| 14-15                                        | 107                               | 23-27                                              |
| 16-17                                        | 115                               | 23-27                                              |
| 18-20                                        | 135                               | 23-27                                              |

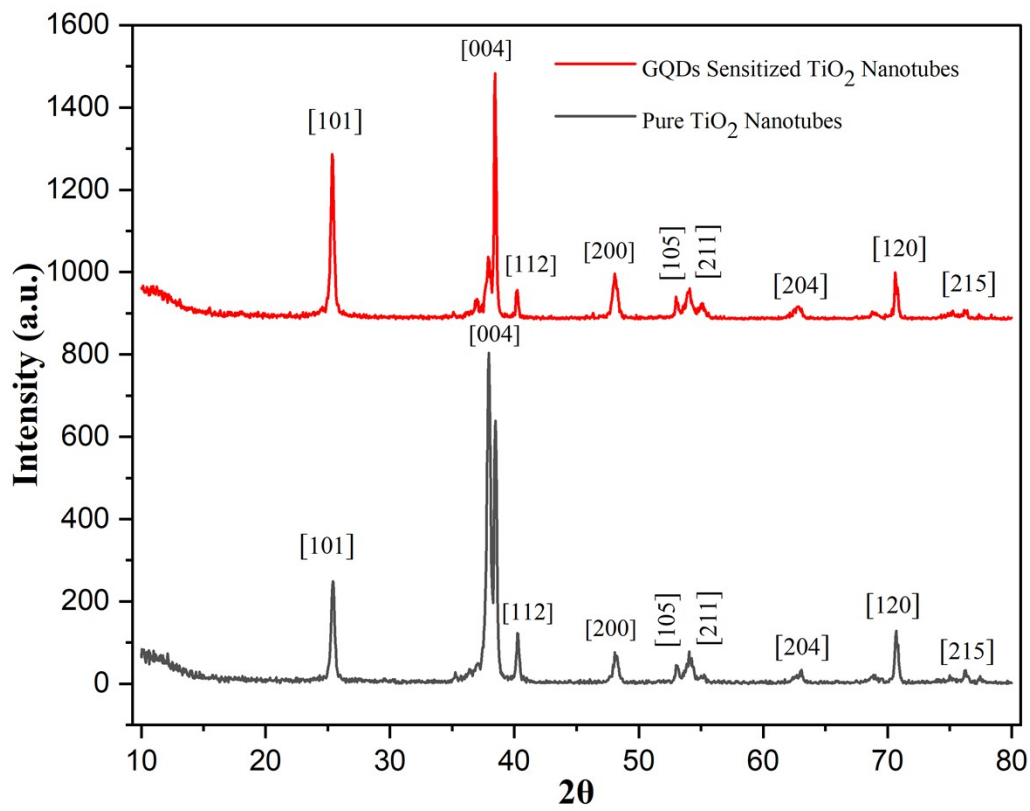

Fig. S4. XRD pattern of Pure TiO<sub>2</sub> NTs and GQDs coated TiO<sub>2</sub> NTs.

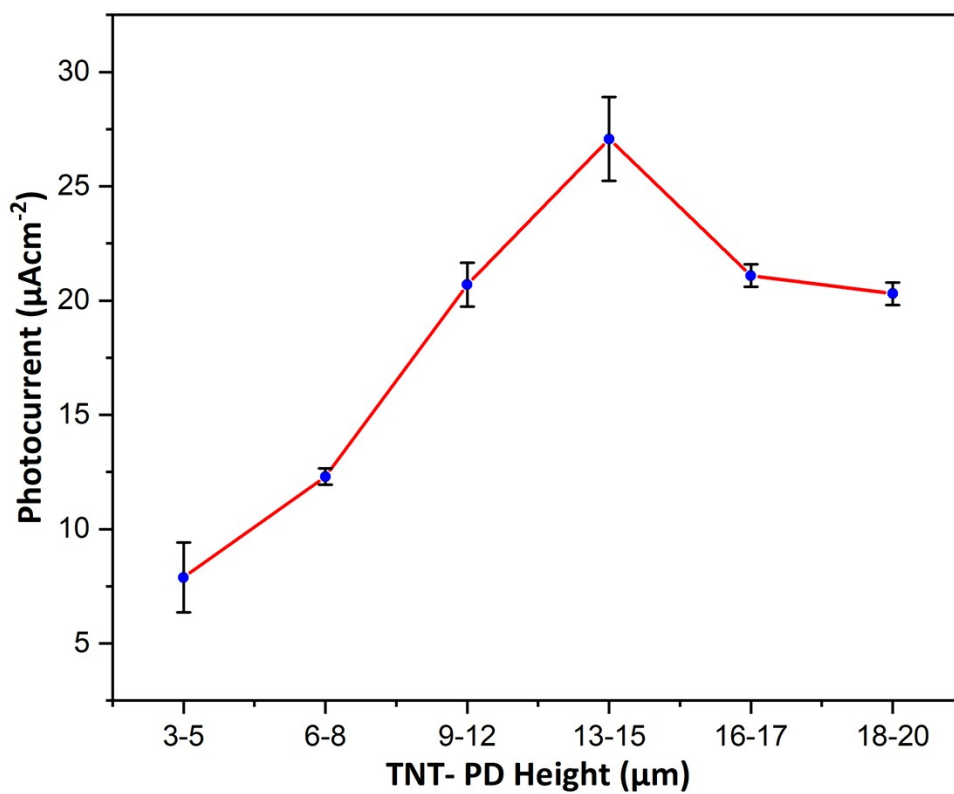

*Fig. S5. Photocurrent of the PEC UV photodetectors made with pure TiO<sub>2</sub> NTs of different heights under UV illumination (365nm, 2mW/cm<sup>2</sup>)*

Table S2. Photocurrent density and responsivity of the PEC UV photodetector made with pure TiO<sub>2</sub> NTs under UV illumination (365nm, 2mW/cm<sup>2</sup>)

| <b>Tubes' height (μm)</b> | <b>Photocurrent density (μA/cm<sup>2</sup>)</b> | <b>Responsivity (μA/W)</b> |
|---------------------------|-------------------------------------------------|----------------------------|
| 3-5                       | 7.88                                            | 3.94                       |
| 6-8                       | 12.3                                            | 6.15                       |
| 10-12                     | 20.7                                            | 10.35                      |
| 14-15                     | 27.07                                           | 13.5                       |
| 16-17                     | 21.09                                           | 10.54                      |
| 18-20                     | 20.3                                            | 10.15                      |



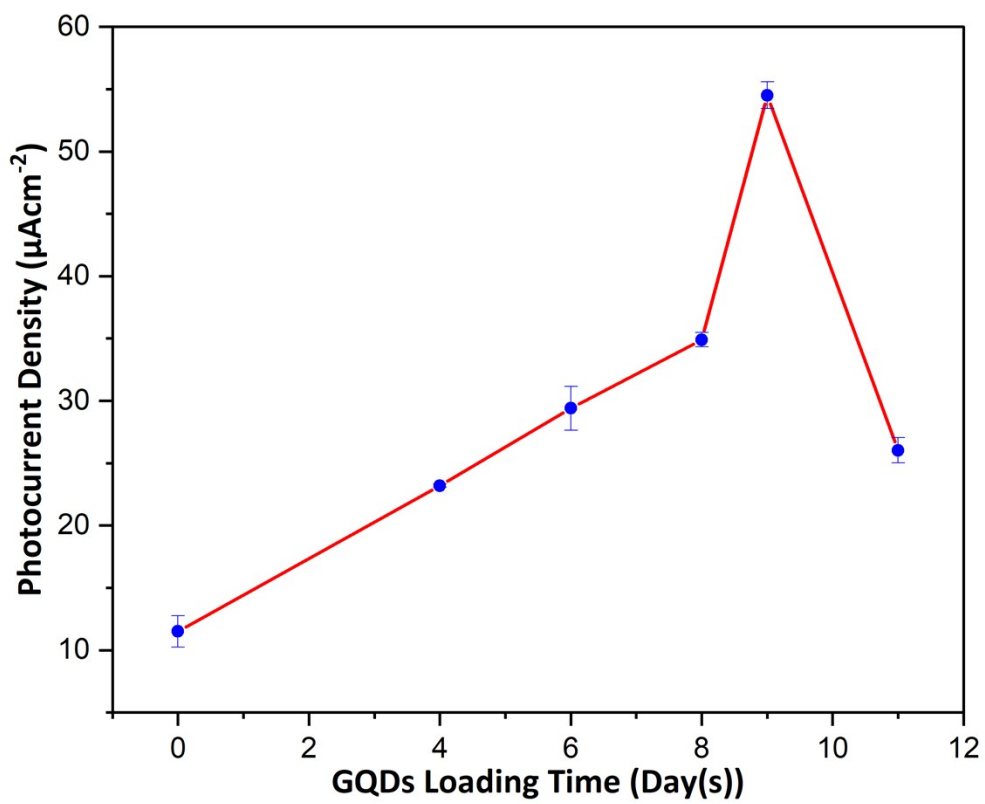

*Fig. S6. GQDs loading time and its effect of the photocurrent density of UV PEC photodetector with 7.5  $\mu\text{m}$   $\text{TiO}_2$  NTs in photoanode.*

*Table S3. GQDs loading time and its effect on the photocurrent density and responsivity of PEC UV photodetector with 7.5  $\mu\text{m}$   $\text{TiO}_2$  NTs in photoanode.*

| <b>GQDs loading time (days)</b>           | <b>Short circuit photocurrent density (<math>\mu\text{A}/\text{cm}^2</math>)</b> | <b>Responsivity (<math>\text{mW}/\text{cm}^2</math>)</b> |
|-------------------------------------------|----------------------------------------------------------------------------------|----------------------------------------------------------|
| Pure 7.5 $\mu\text{m}$ $\text{TiO}_2$ NTs | 11.5                                                                             | 5.75                                                     |
| 4                                         | 23.2                                                                             | 11.6                                                     |
| 6                                         | 29.4                                                                             | 14.7                                                     |
| 8                                         | 34.9                                                                             | 17.45                                                    |
| 9                                         | 54.5                                                                             | 27.25                                                    |
| 11                                        | 26.03                                                                            | 13.01                                                    |

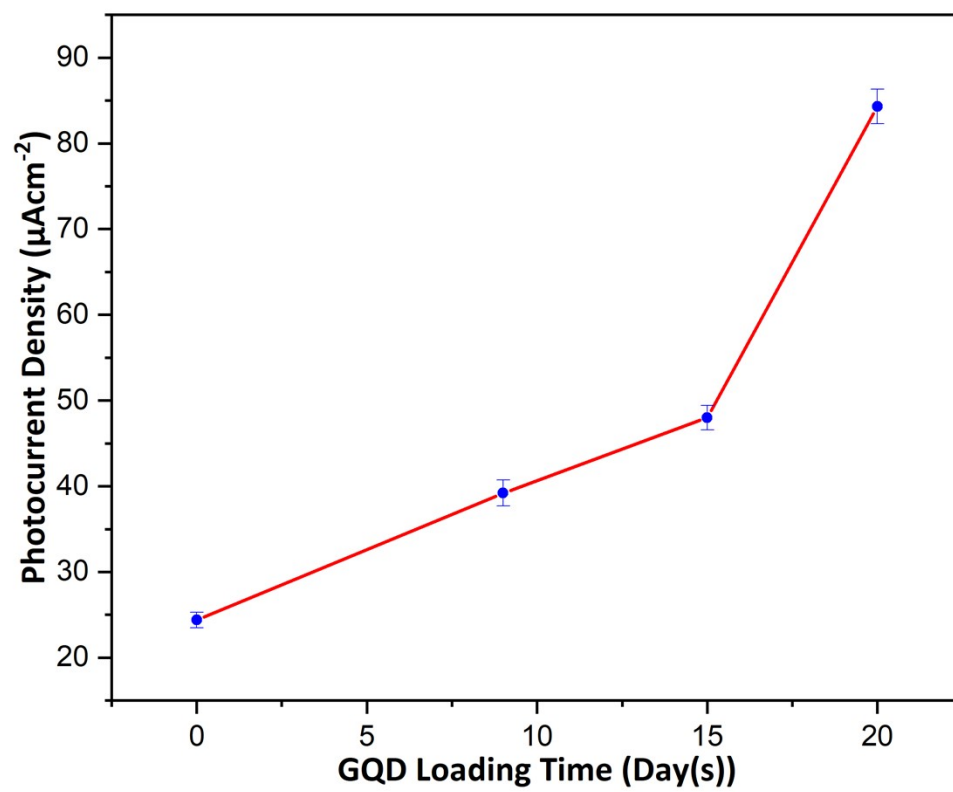

*Fig. S7. GQDs loading time and its effect of the photocurrent density of UV PEC photodetector with 15  $\mu\text{m}$   $\text{TiO}_2$  NTs in photoanode.*

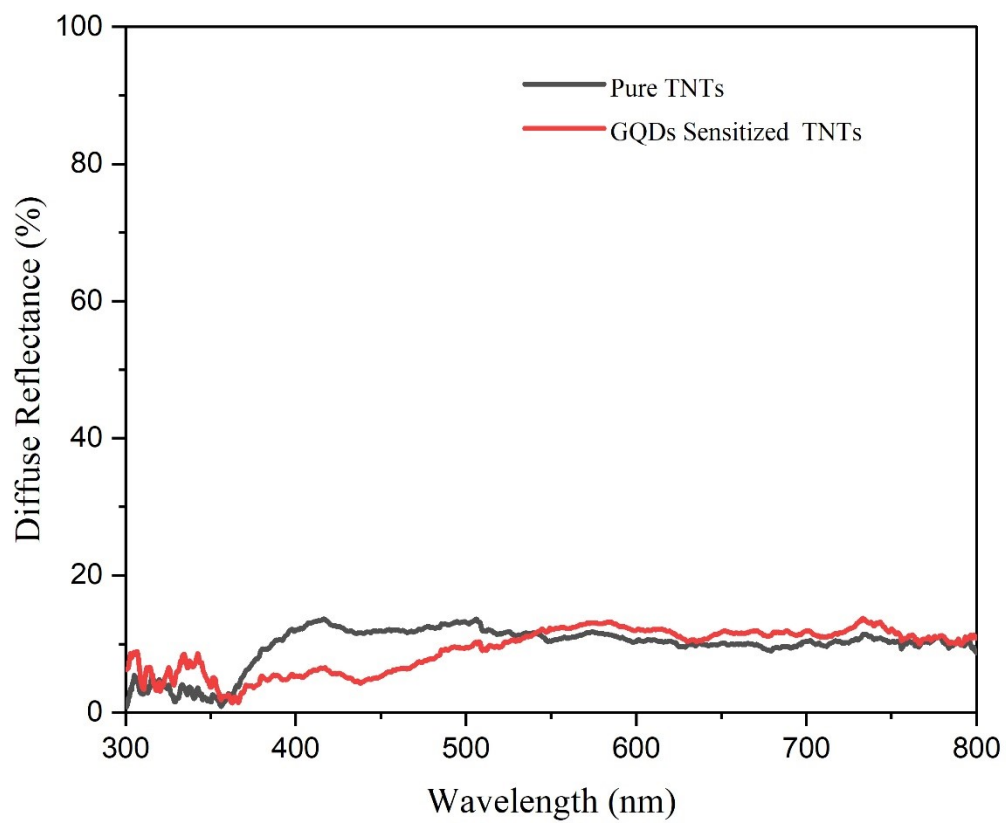

Fig. S8. DRS spectra of pure and GQDs coated  $\text{TiO}_2$  NTs in photoanode.

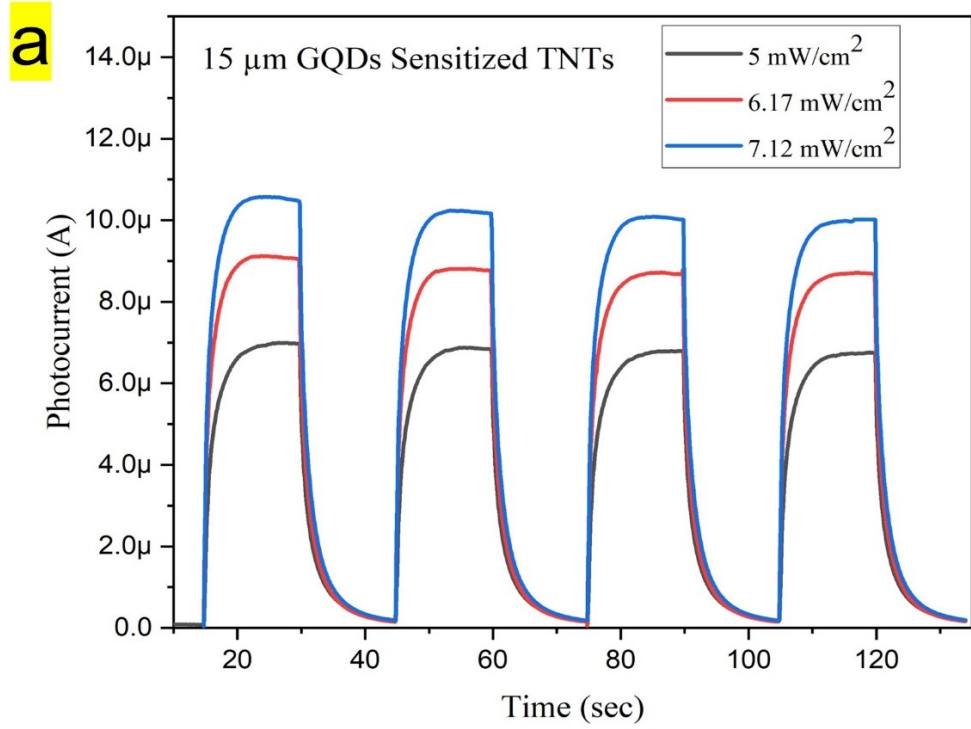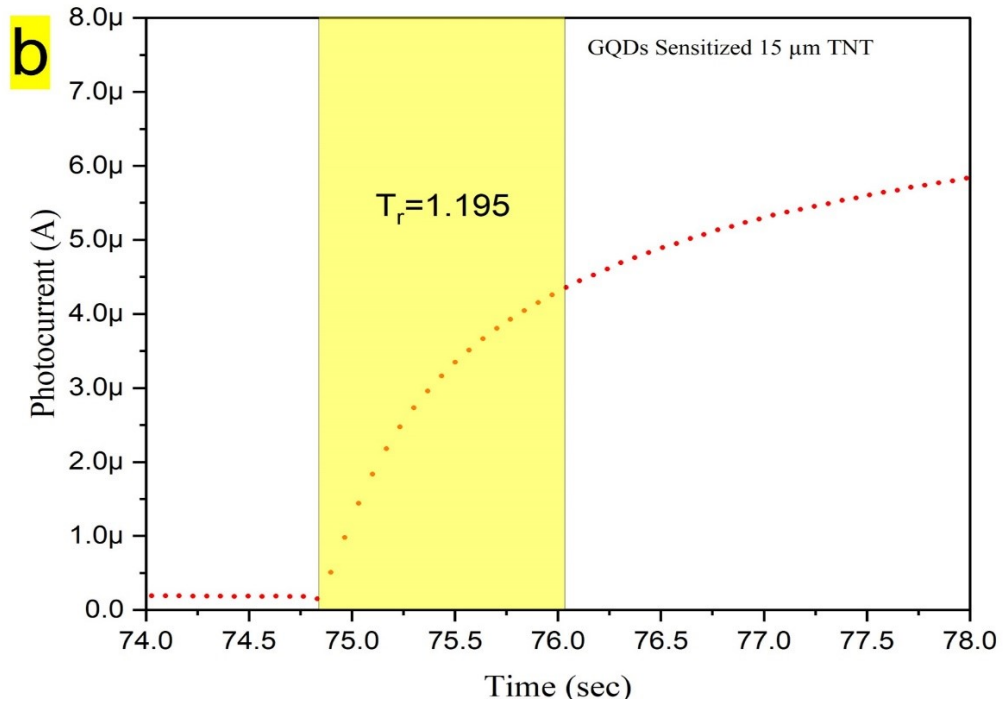

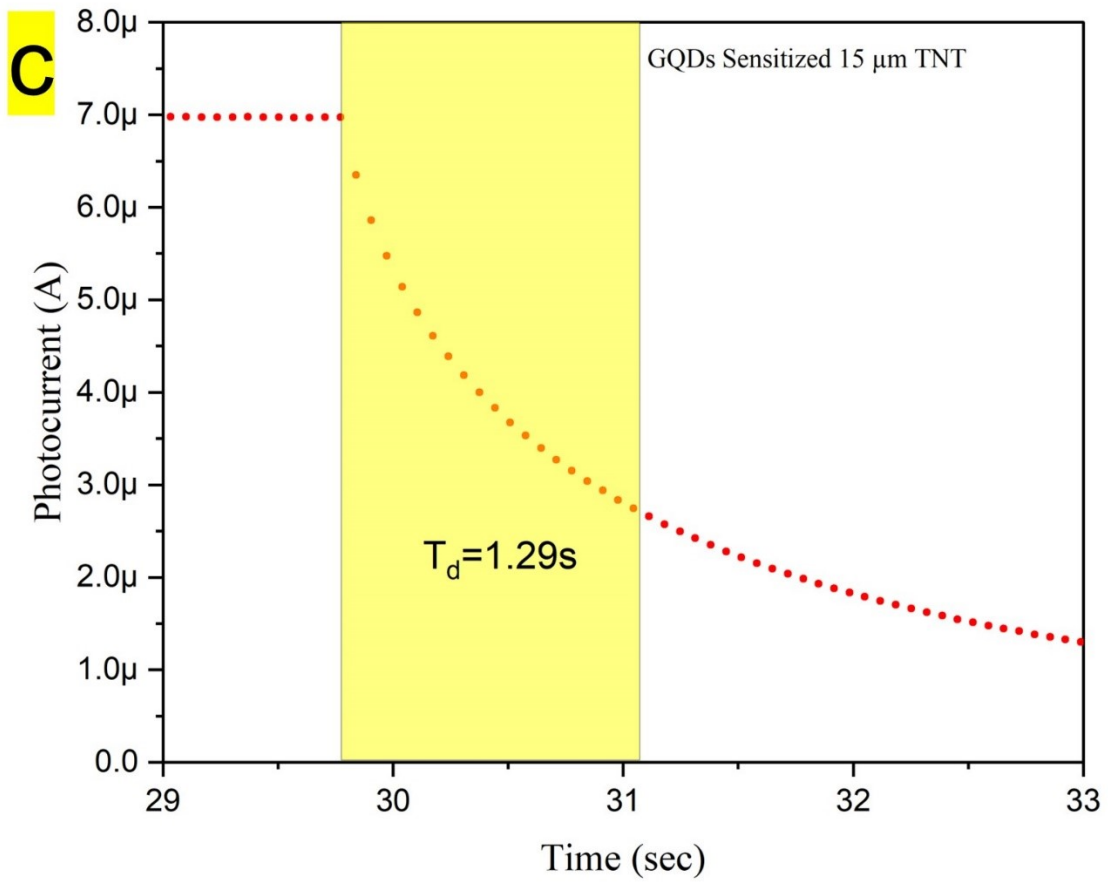

Fig. S9. a) photocurrent response of the 15 μm GQDs sensitized  $TiO_2$  NTs PEC UV photodetector under on/off switching UV LEDs with the power intensity of 5, 6.17 and 7.12  $mW\ cm^{-2}$  at 0 V bias. b,c) enlarged rising and decaying edge of GQDs sensitized 15 μm  $TiO_2$  NTs PEC UV photodetector photo response.

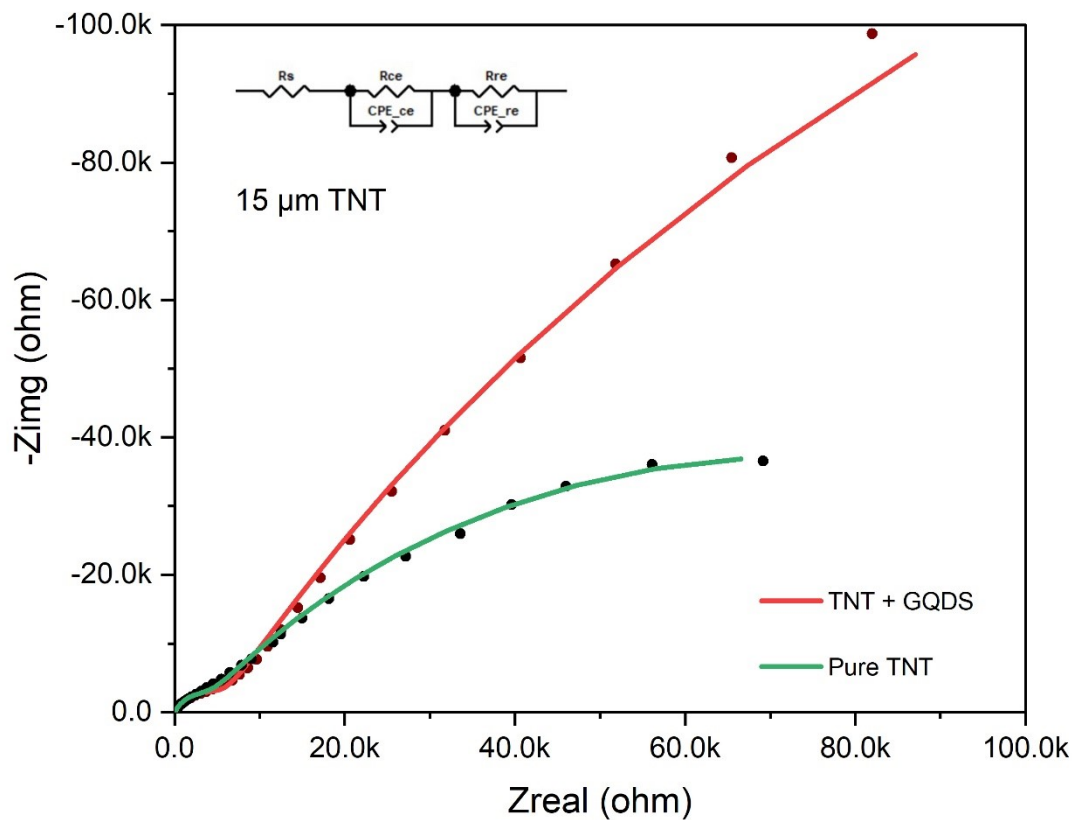

Fig. S10. EIS Nyquist plot for the PEC UV photodetector with 15  $\mu\text{m}$   $\text{TiO}_2$  NTs in photoanode before and after sensitization with GQDs.

Table S4. Quantity of charge recombination resistance at Electrolyte/Photoanode interface.

|                                                                                                  | 7.5 $\mu\text{m}$ TNT |            | 15 $\mu\text{m}$ TNT |            |
|--------------------------------------------------------------------------------------------------|-----------------------|------------|----------------------|------------|
|                                                                                                  | TNT-PD                | GQD-TNT-PD | TNT-PD               | GQD-TNT-PD |
| <b>Charge Recombination<br/>resistance <math>R_{rc}</math><br/>(<math>\text{k}\Omega</math>)</b> | 182.2                 | 526.8      | 141.7                | 489.67     |



Table S5. The photo response performance comparison of various self-powered PEC UV photodetectors reported recently.

| Nanostructures                          | Condition                            | Electrolyte type                            | $T_r$ (s) | $T_d$ (s) | $R_\lambda$ (mA/W) | refs      |
|-----------------------------------------|--------------------------------------|---------------------------------------------|-----------|-----------|--------------------|-----------|
| TiO <sub>2</sub> /Ag/ZnS nanotubes      | 365 nm, 40 mWcm <sup>-2</sup> , 0 V  | polysulfide                                 | 0.16      | 0.18      | 12.42              | [1]       |
| TiO <sub>2</sub> nanotube arrays        | 365 nm, 3 mWcm <sup>-2</sup> , 0 V   | S <sup>2-</sup> /Sx <sup>2-</sup>           | 0.004     | 0.004     | 22                 | [2]       |
| Titanium Dioxide Nanotube               | 360 nm, 115 mWcm <sup>-2</sup> , 1 V | Na <sub>2</sub> SO <sub>4</sub>             | 0.88      | 1.28      | 0.73               | [3]       |
| GQDs coated 7.5 μm TiO <sub>2</sub> NTs | 365 nm, 2mWcm <sup>-2</sup> , 0 V    | I <sup>-</sup> /I <sub>3</sub> <sup>-</sup> | 0.73      | 0.88      | 27.5               | This work |
| GQDs coated 15 μm TiO <sub>2</sub> NT   | 365 nm, 2mWcm <sup>-2</sup> , 0 V    | I <sup>-</sup> /I <sub>3</sub> <sup>-</sup> | 1.195     | 1.29      | 42.5               | This work |

## References

- [1] X. Li, S. Gao, G. Wang, Z. Xu, S. Jiao, D. Wang, Y. Huang, D. Sang, J. Wang, Y. Zhang, A self-powered ultraviolet photodetector based on TiO<sub>2</sub>/Ag/ZnS nanotubes with high stability and fast response, *J. Mater. Chem. C*. 8 (2020) 1353–1358. <https://doi.org/10.1039/c9tc05326c>.
- [2] J. Chen, B. Hu, C. Chen, X. Lv, H. San, W. Hofmann, A HIGH-PERFORMANCE SELF-POWERED UV PHOTODETECTOR BASED ON SELF-DOPING TiO<sub>2</sub> NANOTUBE ARRAYS Pen-Tung Sah Institute of Micro-Nano Science and Technology, Xiamen University, CHINA and Institute of Solid State Physics, Technical University of Berlin, Ber, 2019 20th Int. Conf. Solid-State Sensors, Actuators Microsystems Eurosensors XXXIII (TRANSDUCERS EUROSensors XXXIII). (2019) 1329–1332.
- [3] S. Ng, F.K. Yam, S.N. Sohimee, K.P. Beh, S.S. Tneh, Y.L. Cheong, Z. Hassan, Photoelectrochemical ultraviolet photodetector by anodic titanium dioxide nanotube layers, *Sensors Actuators, A Phys.* 279 (2018) 263–271. <https://doi.org/10.1016/j.sna.2018.06.030>.
